# Supplementary material
Source: MDPI journal article supplement (https://www.mdpi.com/2313-0105/7/1/1)
Supplement: s1 [file s1]

Article

# Effect of Vinylene Carbonate Electrolyte Additive on the Surface Chemistry and Pseudocapacitive Sodium-Ion Storage of TiO<sub>2</sub> Nanosheet Anodes

Rudi Ruben Maça <sup>1,2</sup> and Vinodkumar Etacheri <sup>1,\*</sup>

<sup>1</sup> Electrochemistry Division, IMDEA Materials Institute, 28906 Madrid, Spain; rudi.maca@imdea.org

<sup>2</sup> Faculty of Science, Universidad Autónoma de Madrid, 28049 Madrid, Spain

\* Correspondence: vinodkumar.etacheri@imdea.org

**Citation:** Maça, R.R.; Etacheri, V. Effect of Vinylene Carbonate Electrolyte Additive on the Surface Chemistry and Pseudocapacitive Sodium-Ion Storage of TiO<sub>2</sub> Nanosheet Anodes. *Batteries* **2021**, *7*, 1. <https://doi.org/10.3390/7010001>

Received: 20 November 2020

Accepted: 21 December 2020

Published: date

**Publisher's Note:** MDPI stays neutral with regard to jurisdictional claims in published maps and institutional affiliations.

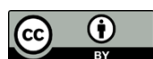

**Copyright:** © 2020 by the authors. Submitted for possible open access publication under the terms and conditions of the Creative Commons Attribution (CC BY) license (<http://creativecommons.org/licenses/by/4.0/>).

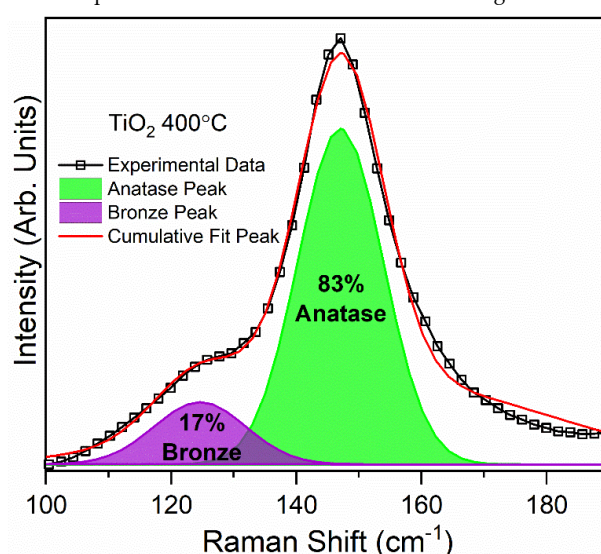

**Figure S1.** Quantification of anatase and bronze content from high-resolution Raman spectra.

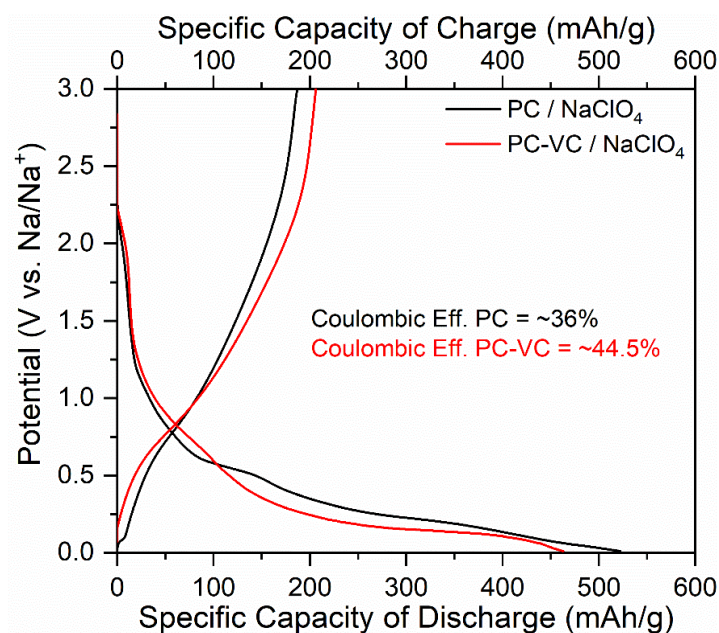

**Figure S2.** First cycle charge-discharge voltage profiles of TiO<sub>2</sub> nanosheet anode in VC-free and VC-containing electrolyte solutions.

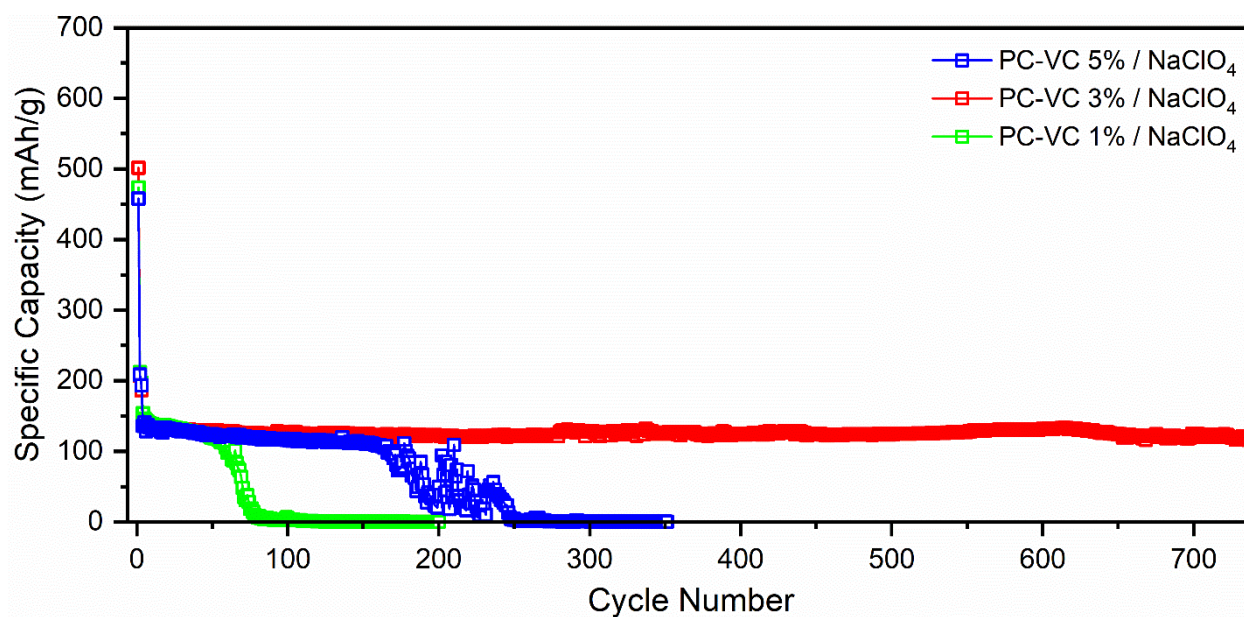

**Figure S3.** Galvanostatic cycling performance of hybrid  $\text{TiO}_2$  anode with PC-VC /  $\text{NaClO}_4$  electrolyte solution with 1%, 3% and 5% VC additive.

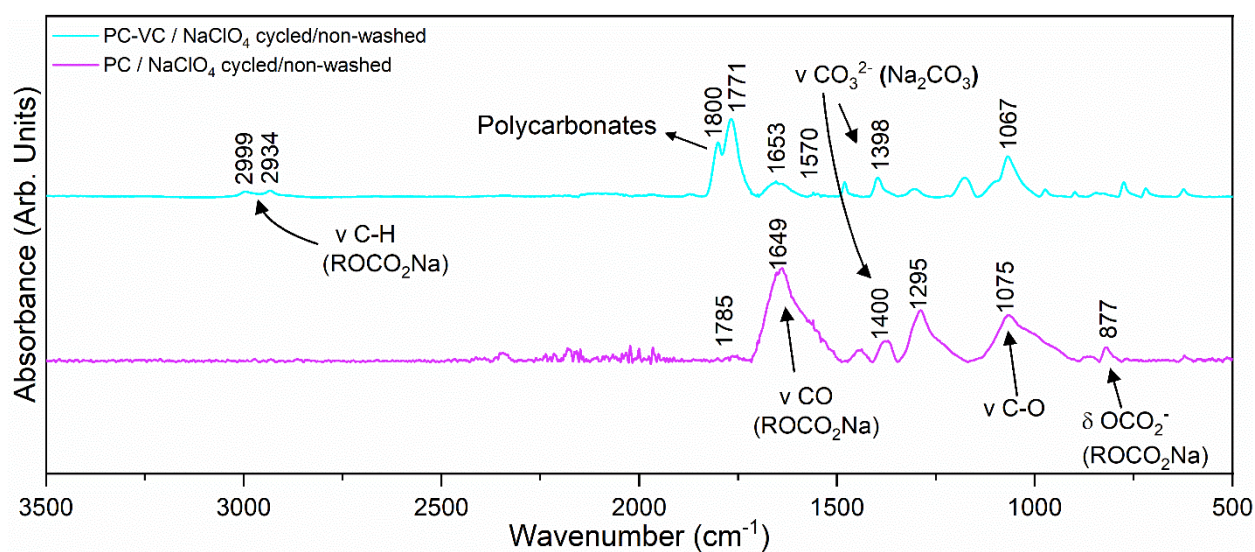

**Figure S4.** FTIR spectra for cycled  $\text{TiO}_2$  laminates in PC /  $\text{NaClO}_4$  and PC-VC /  $\text{NaClO}_4$  without washing.
